# Supplementary material for: Metabolomic therapy response prediction in pretherapeutic tissue biopsies for trastuzumab in patients with HER2‐positive advanced gastric cancer
Source: PubMed Central journal article supplement (PMC8473480; doi:10.1002/ctm2.547), 2021-09-26
Supplement: CTM2-11-e547-s001.pdf [file CTM2-11-e547-s001.pdf]

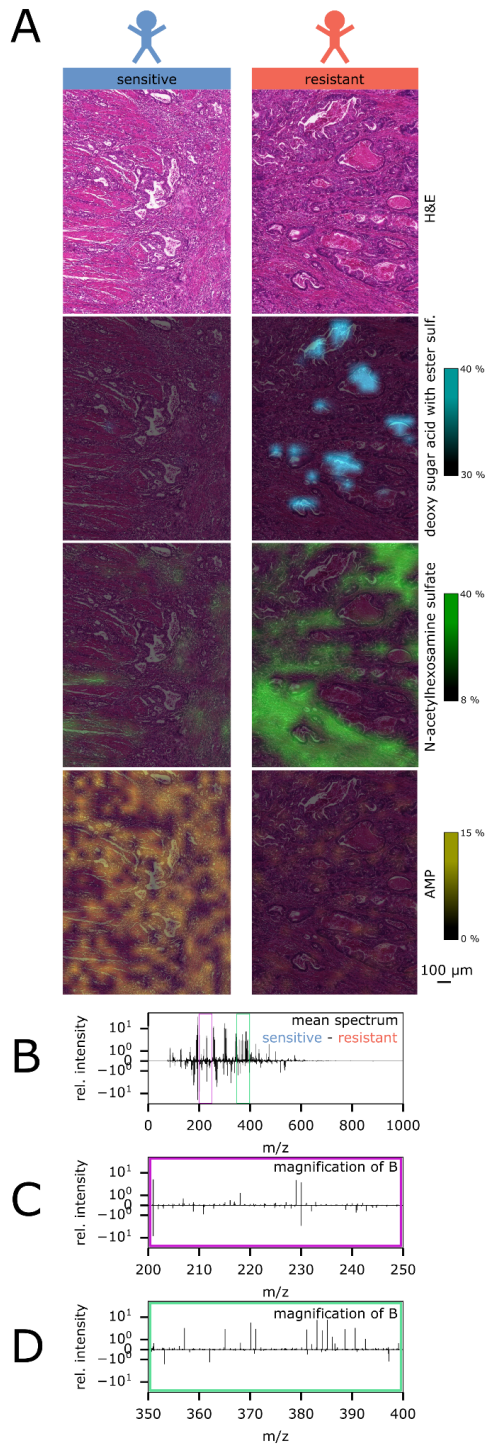

**Supplemental Figure 1. Examples of changed metabolites between trastuzumab-resistant and trastuzumab-sensitive patient groups.** A Ion map visualizations of deoxy sugar acid with ester sulfate (*blue*) and N-acetylhexosamine sulfate (*green*) revealed higher abundances in trastuzumab-resistant patients (*right column*). The quantities of both metabolites were lower in the tissues of trastuzumab-sensitive patients (*left*

column). On the contrary, AMP (yellow) revealed a higher abundance in tissues of sensitive patients compared with that of patients with resistant HER2-positive advanced gastric cancer. **B** Difference spectra of mean intensities between trastuzumab-resistant and trastuzumab-sensitive patient groups are exposing the 122 significantly changed metabolites in individual mass ranges. Zoom-in of the difference spectra **B** to the mass ranges **C** 200-250  $m/z$  and **D** 350-400  $m/z$ .

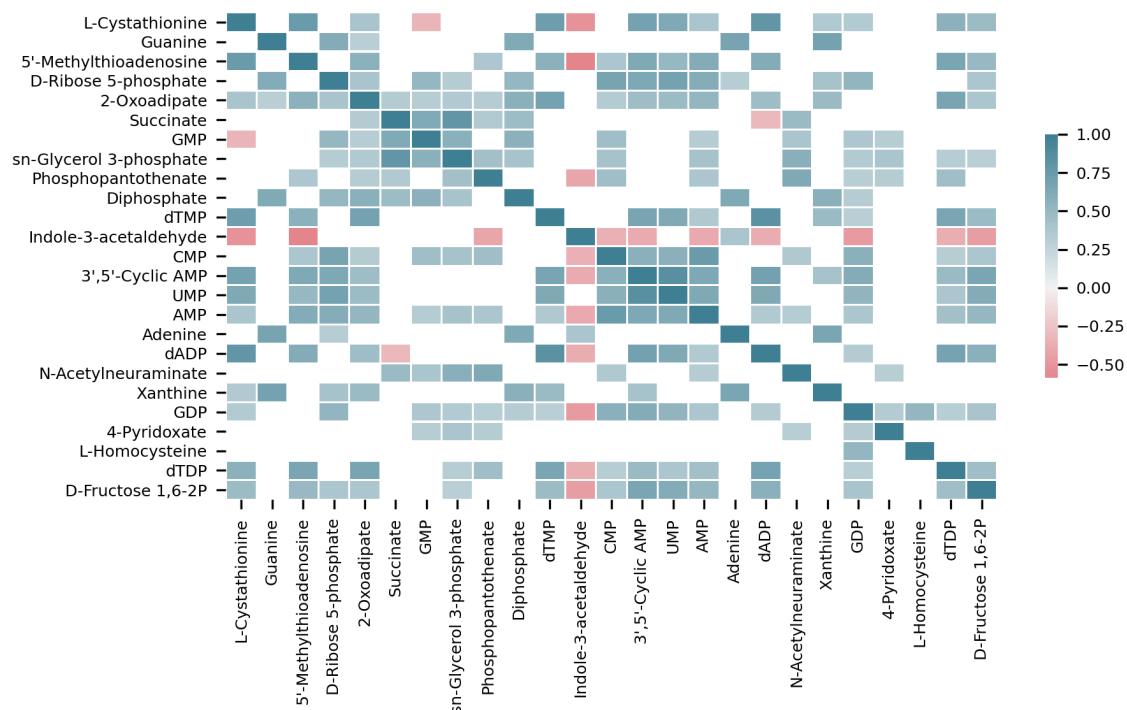

**Supplemental Figure 2. Spearman's rank correlation for the 25 most important metabolites in the classifier.** Blue squares are indicating significant positive correlation, red squares significant negative correlation. The color is associated with Spearman's rank correlation coefficient. Empty squares indicate that no significant correlation was found.

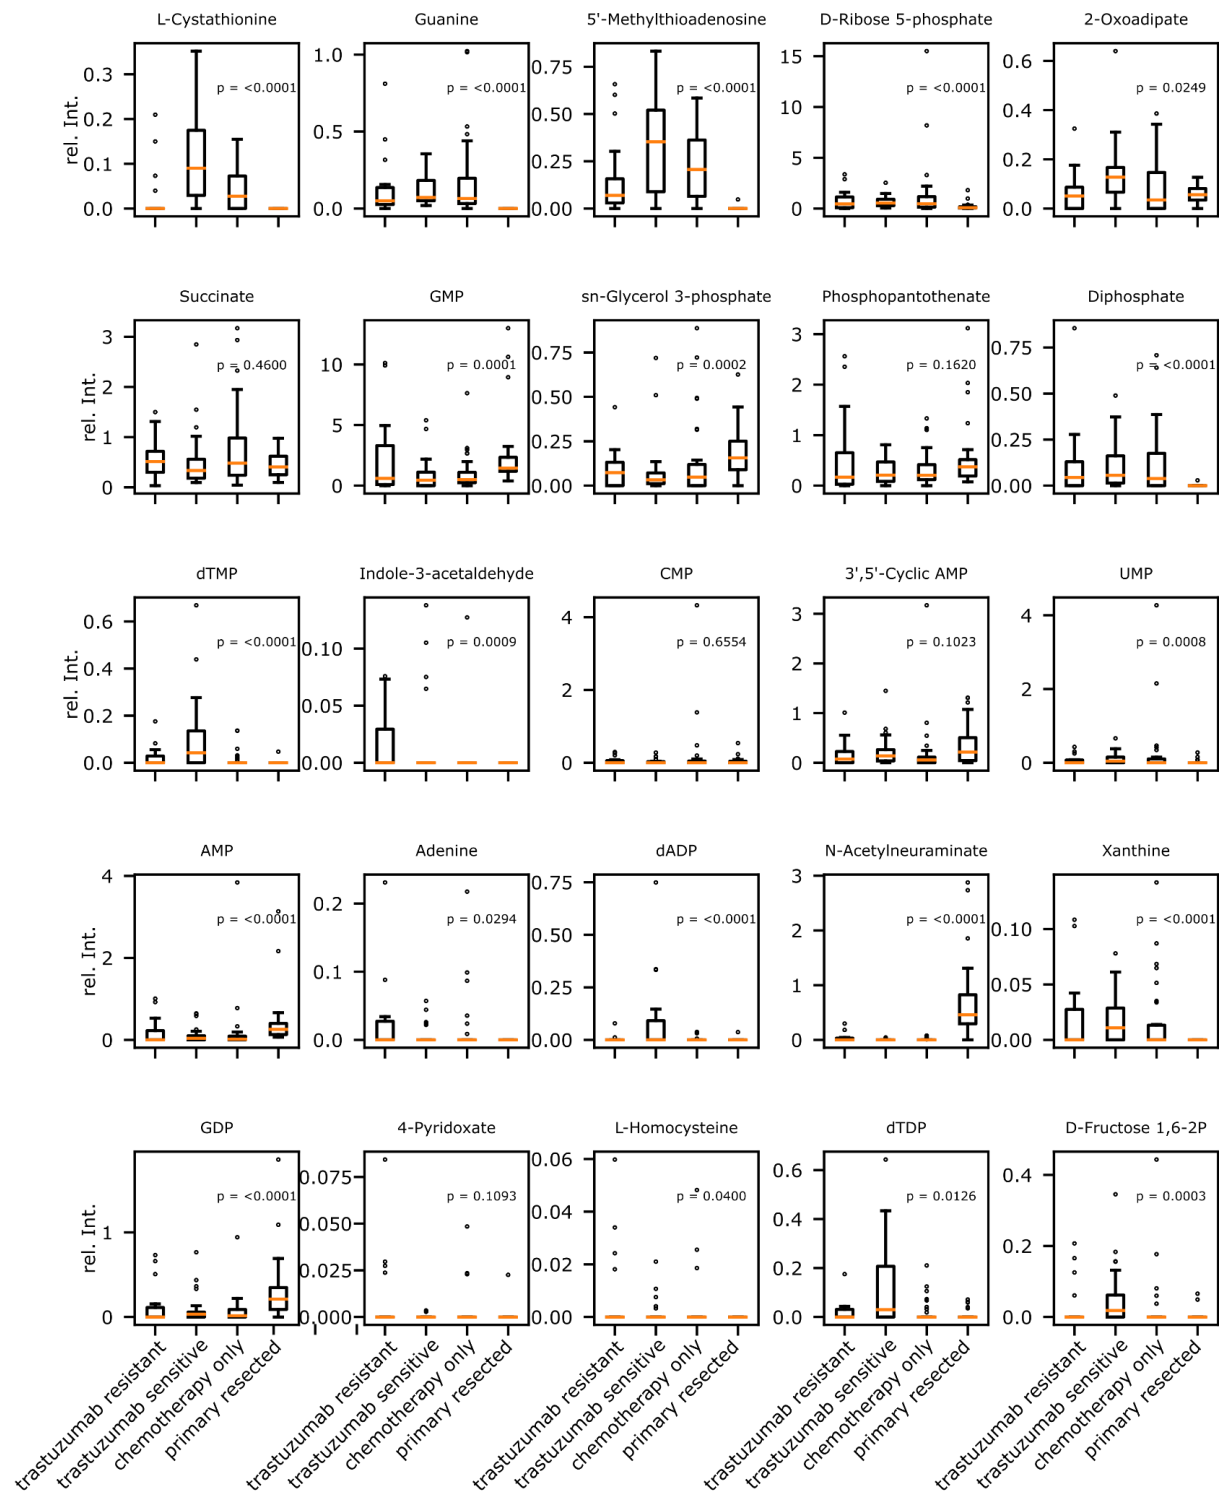

**Supplemental Figure 3. Abundances of the 25 most important metabolites in the treated patient groups. P values are corresponding to the Kruskal–Wallis test per metabolite.**

**Supplementary Table 1. Baseline characteristics**

|                              |            | Trastuzumab and chemotherapy |            | Only chemotherapy | No trastuzumab No chemotherapy |
|------------------------------|------------|------------------------------|------------|-------------------|--------------------------------|
|                              |            | Resistant                    | Sensitive  |                   |                                |
| <b>Total</b>                 | 106        | 17                           | 25         | 33                | 31                             |
| <b>Gender</b>                |            |                              |            |                   |                                |
| Male                         | 79         | 12                           | 21         | 24                | 22                             |
| Female                       | 27         | 5                            | 4          | 9                 | 9                              |
| <b>Age, median (min-max)</b> | 67 (24-86) | 73 (24-86)                   | 64 (46-79) | 66 (37-85)        | 68 (34-82)                     |
| <b>UICC stage</b>            |            |                              |            |                   |                                |
| IV                           | 106        | 17                           | 25         | 33                | 31                             |
| <b>Histotype</b>             |            |                              |            |                   |                                |
| Intestinal type              | 47         | 6                            | 13         | 9                 | 19                             |
| Diffuse type                 | 25         | 3                            | 1          | 10                | 11                             |
| Mixed type                   | 5          | 1                            | 0          | 3                 | 1                              |
| n.a.                         | 29         | 7                            | 11         | 11                | 0                              |
| <b>HER2 IHC score</b>        |            |                              |            |                   |                                |
| 0+                           | 37         | 0                            | 0          | 18                | 19                             |
| 1+                           | 14         | 0                            | 0          | 7                 | 7                              |
| 2+                           | 16         | 3                            | 4          | 5                 | 4                              |
| 3+                           | 39         | 14                           | 21         | 3                 | 1                              |
| <b>HER2 CISH</b>             |            |                              |            |                   |                                |
| Amplified                    |            | 16                           | 24         | 3                 | n.a.                           |
| Non-amplified                |            | 0                            | 0          | 28                | n.a.                           |
